# Supplementary material for: Molecular Detection of Eukaryotes in a Single Human Stool Sample from Senegal
Source: PLOS journal article supplement (doi:10.1371/journal.pone.0040888), 2012-07-13
Supplement: S1 (10.1371/journal.pone.0040888.s001) [file journal.pone.0040888.s001]

Table S1: Primers used in this study.

| Phyla | Primer | Sequence | Targeted Sequence | Product size | Ta | Reference | Primer used |
| --- | --- | --- | --- | --- | --- | --- | --- |
| Microsporidia | V1 | CACCAGGTTGATTCTGCCTGAC | 18S rRNA | 250-279 | 55 | [1] | HG |
|  | PMP2 | CCTCTCCGGAACCAAACCCTG |  |  |  |  | HG |
| Entamoeba | JVF | GTTGATCCTGCCAGTATTATATG | 18S rRNA | 600 to 650 | 57 | [2] | HG |
|  | DSPR2 | CACTATTGGAGCTGGAATTAC |  |  |  |  | HG |
| Eukarya | Euk1A | CTGGTTGATCCTGCCAG | 18s rRNA | 570-600 | 55 | [3] | HG |
|  | Euk 516r- | ACCAGACTTGCCCTCC |  |  |  | [4] | HG |
| Eukarya | FUNF | GATCCCTAGTCGGCATAGTT | 18s rRNA | 1000 | 52 | [5] | HG |
|  | FUNR | GTAGTCATATGCTTGTCTC |  |  |  |  | HG |
| Eukarya | EUKA | AACCTGGTTGATCCTGCCAGT | 18s rRNA | 1800 | 55 | [6] | HG |
|  | EUKB | TGATCCTTCTGCAGGTTCACCTAC |  |  |  |  | HG |
| Eukarya | NSI | GTAGTCATATGCTTGTCTC | 18s rRNA | 1650 | 48 | [7] | HG |
|  | FR1 | AICCATTCAATCGGTAIT |  |  |  | [8] | HG |
| Fungi | ITS F | CTTGGTCATTTAGAGGAAGTAA | ITS | 580 | 50 | [7] | HG |
|  | ITS-4R | TCCTCCGCTTATTGATATGC |  |  |  | [9] | HG |
| Dinoflagellates | 18ScomF1 | GCTTGTCTCAAAGATTAAGCCATGC | 18S rRNA | 650 | 58 | [10] | E |
|  | Dino18SR1 | GAGCCAGATRCDCACCCA |  |  |  |  | E |
| Trichomonads | TFR1 | TGCTTCAGTTCAGCGGGTCTTCC | 5,8S rRNA | 338-391 | 60 | [11] | E |
|  | TFR2 | CGGTAGGTGAACCTGCCGTTGG |  |  |  |  | E |
| Diplomonads | DimA | AACCTGGTTGATCTTGCCAG | 18S rRNA | - | 55 | [12] | E |
|  | DimB | CYGCAGGTTCACCTACGGAA |  |  |  |  | E |
| Kinetoplastidia | Kineto_kin1 | GCGTTCAAAGATTGGGCAAT | 18S rRNA | 600-650 | 55 | [13] | E |
|  | Kineto_kin2 | CGCCCGAAAGTTCACC |  |  |  |  | E |
| Amoeba | Ami6F1 | CCAGCTCCAATAGCGTATATT | 18S rRNA | 830 | 55 | [14] | E |
|  | Ami9R | GTTGAGTCGAATTAAGCCGC |  |  |  |  | E |
| Acanthamoeba | JDP1 | GGCCCAGATCGTTTACCGTGAA | 18S rRNA | 460-470 | 60 | [15] | E |
|  | JDP2 | TCTCACAAGCTGCTAGGGAGTCA |  |  |  |  | E |
| Naegleria | F | GAACCTGCGTAGGGATCATTT | ITS | 388 -376 | 55 | [16] | E |
|  | R | TTTCTTTTCCTCCCCTTATTA |  |  |  |  | E |
| Hartmannella | Hv1227F | TTACGAGGTCAGGACACTGT | 18S rRNA | 501 | 56 | [17] | E |
|  | Hv1728R | GACCATCCGGAGTTCTCG |  |  |  |  | E |
| Ciliophora | 121 F | CTGCGAATGGCTCATTAMAA | 18S rRNA | 750 | 55 | [18] | E |
|  | 1147R | GACGGTATCTRATCGTCTTT |  |  |  |  | E |
| Diatoms | 18SF | GTTTCCGTAGGTGAACCTGC | 18S rRNA | 700-900 | 60 | [19] | E |
|  | 28SR | GCTTATTAATATGCTTAAATTCAGCG |  |  |  |  | E |
| Rhodophyta | RUBI_F | CGCTGCTAAAACTTGTGGGC | RUBISCO | 500 | 56 | [20] | E |
|  | RUBI_R | GGCGTTGTAATAAGAATCCTGG |  |  |  |  | E |
| Chlorophyta | UCP1_F | CAAGCWCCDGCAGAAGACC | rps11-rpl2 | 384 | 54 | [21] | E |
|  | UCP1_R | CCMAAACATAAACAAMSWCAGG |  |  |  |  | E |
| Euglenophyta | EAF | GTCATATGCTTYKTTCAAGGRCTAAGCC | 18S rRNA | - | 55 | [22] | E |
|  | EAF3 | TCGACAATCTGGTTGATCCTGCCAG |  |  |  |  | E |
| Eukarya | E528F | CGGTAATTCCAGCTCC | 18s rRNA | 1000-1300 | 55 | [23] | E |
|  | Univ1391RE | ACCTTGTTACGRCTT |  |  |  | [24] | E |
| Eukarya | E528F | CGGTAATTCCAGCTCC | 18s rRNA | 1000-1300 | 55 | [23] | E |
|  | Univ1492RE | GGGCGGTGTGTACAARGRG |  |  |  | [24] | E |
| Eukarya | EK1F | CTGGTTGATCCTGCCAG | 18s rRNA | 1520 | 55 | [25] | E |
|  | EK-1520 | CYGCAGGTTCACCTAC |  |  |  |  | E |
| Eukarya | EK-82F | GAAACTGCGAATGGCTC | 18s rRNA | 1432 | 55 | [25] | E |
|  | EK-1520 | CYGCAGGTTCACCTAC |  |  |  |  | E |
| *Malassezia* | MF | TAACAAGGATTCCCCTAGTA | 28s rRNA | 580 | 55 | [26] | E |
|  | MR | ATTACGCCAGCATCCTAAG |  |  |  |  | E |

Ta = annealing temperature

Hg = Human gut

E = Environments

RUBISCO =Ribulose-1, 5-bisphosphate carboxylase oxygenase

References

1. Chabchoub N, Abdelmalek R, Mellouli F, Kanoun F, Thellier M et al. (2009) Genetic identification of intestinal microsporidia species in immunocompromised patients in Tunisia. Am J Trop Med Hyg 80: 24-27.

2. Verweij JJ, Laeijendecker D, Brienen EA, van LL, Polderman AM (2003) Detection and identification of entamoeba species in stool samples by a reverse line hybridization assay. J Clin Microbiol 41: 5041-5045.

3. Sogin ML, Gunderson J (1987) Structural Diversity of Eukaryotic Small Subunit Ribosomal RNAsa. Annals of the New York Academy of Sciences 503: 125-139.

4. Amann RI, Binder BJ, Olson RJ, Chisholm SW, Devereux R et al. (1990) Combination of 16S rRNA-targeted oligonucleotide probes with flow cytometry for analyzing mixed microbial populations. Appl Environ Microbiol 56: 1919-1925.

5. Chen Y, Chen Z, Guo R, Chen N, Lu H et al. (2010) Correlation between gastrointestinal fungi and varying degrees of chronic hepatitis B virus infection. Diagn Microbiol Infect Dis70:492-498.

6. Medlin L, Elwood HJ, Stickel S, Sogin ML (1988) The characterization of enzymatically amplified eukaryotic 16S-like rRNA-coding regions. Gene 71: 491-499.

7. White TJ, ., Bruns TD, Lee S TJ (1990) Amplification and direct sequencing of fungal ribosomal RNA genes for phylognetics. PCR protocols: a guide and applications. New York: Academic Press, Harcourt Brace Jovanovich 315-322.

8. Vainio EJ, Hantula J (2000) Direct analysis of wood-inhabiting fungi using denaturing gradient gel electrophoresis of amplified ribosomal DNA. Mycol Res 104: 927-936.

9. Gardes M, Bruns TD (1993) ITS primers with enhanced specificity for basidiomycetes--application to the identification of mycorrhizae and rusts. Mol Ecol 2: 113-118.

10. Lin S, Zhang H, Hou Y, Miranda L, Bhattacharya D (2006) Development of a dinoflagellate-oriented PCR primer set leads to detection of picoplanktonic dinoflagellates from Long Island Sound. Appl Environ Microbiol 72: 5626-5630.

11. Corbeil LB, Campero CM, Van HK, Bondurant RH (2008) Detection of trichomonad species in the reproductive tracts of breeding and virgin bulls. Vet Parasitol 154: 226-232.

12. Kolisko M, Silberman JD, Cepicka I, Yubuki N, Takishita K et al. (2010) A wide diversity of previously undetected free-living relatives of diplomonads isolated from marine/saline habitats. Environ Microbiol 12: 2700-2710.

13. McLaughlin GL, Ssenyonga SS, Nanteza E, Rubaire-Akiki., Wafula O et al. (1996) PCR-based detection and typing of parasites. M A Azcel and M Z Alkan, eds Parasitology for the 21st Century CAB International, Wallingford, Oxon, United Kingdom 261-270.

14. Thomas V, Herrera-Rimann K, Blanc DS, Greub G (2006) Biodiversity of amoebae and amoeba-resisting bacteria in a hospital water network. Appl Environ Microbiol 72: 2428-2438.

15. Schroeder JM, Booton GC, Hay J, Niszl IA, Seal DV et al. (2001) Use of subgenic 18S ribosomal DNA PCR and sequencing for genus and genotype identification of acanthamoebae from humans with keratitis and from sewage sludge. J Clin Microbiol 39: 1903-1911.

16. Pelandakis M, Pernin P (2002) Use of multiplex PCR and PCR restriction enzyme analysis for detection and exploration of the variability in the free-living amoeba Naegleria in the environment. Appl Environ Microbiol 68: 2061-2065.

17. Kuiper MW, Valster RM, Wullings BA, Boonstra H, Smidt H et al. (2006) Quantitative detection of the free-living amoeba *Hartmannella vermiformis* in surface water by using real-time PCR. Appl Environ Microbiol 72: 5750-5756.

18. Dopheide A, Lear G, Stott R, Lewis G (2008) Molecular characterization of ciliate diversity in stream biofilms. Appl Environ Microbiol 74: 1740-1747.

19. Senapin S, Phiwsaiya K, Kiatmetha P, Withyachumnarnkul B (2011) Development of primers and a procedure for specific identification of the diatom *Thalassiosira weissflogii*. Aquaculture International 19:693-704

20. Wang C, Dong D, Wang G, Zhang B, Peng G et al. (2009) An improved PCR method for direct identification of Porphyra (Bangiales, Rhodophyta) using conchocelis based on a RUBISCO intergenic spacer. 513-518.

21. Provan J, Murphy S, Mggs C (2004) Universal plastid primers for chlorophyta and rhodophyta. EUR J PHYCOL 39: 43-50.

22. Marin B, Palm A, Klingberg M, Melkonian M (2003) Phylogeny and taxonomic revision of plastid-containing euglenophytes based on SSU rDNA sequence comparisons and synapomorphic signatures in the SSU rRNA secondary structure. Protist 154: 99-145.

23. Edgcomb VP, Kysela DT, Teske A, de Vera GA, Sogin ML (2002) Benthic eukaryotic diversity in the Guaymas Basin hydrothermal vent environment. Proc Natl Acad Sci U S A 99: 7658-7662.

24. Dawson SC, Pace NR (2002) Novel kingdom-level eukaryotic diversity in anoxic environments. Proc Natl Acad Sci U S A 99: 8324-8329.

25. DeLong EF (1992) Archaea in coastal marine environments. Proc Natl Acad Sci U S A 89: 5685-5689.

26. Mirhendi H, Makimura K, Zomorodian K, Yamada T, Sugita T et al. (2005) A simple PCR-RFLP method for identification and differentiation of 11 Malassezia species. Journal of Microbiological Methods 61: 281-284.
